# Supplementary material for: Study of the estrogenic-like mechanism of glycosides of cistanche using metabolomics
Source: Royal Society of Chemistry journal article supplement (doi:10.1039/c7ra06930h), 2017-01-01
Supplement: c7ra06930h1.pdf [file c7ra06930h1.pdf]

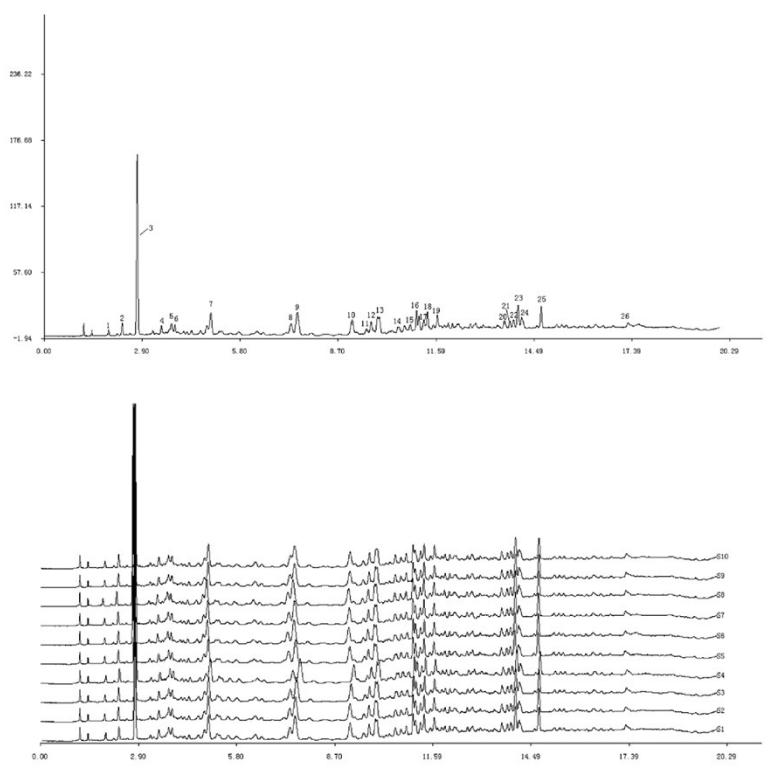

Supplemental Figure 1. The fingerprint of GCs.

Supplemental Table 1. The MS condition of biochemical marker

|    |                                   | Q1Mass | Q3Mass | DP      | EP      | CE      | CXP     |
|----|-----------------------------------|--------|--------|---------|---------|---------|---------|
|    | ID                                | (Da)   | (Da)   | (Volts) | (Volts) | (Volts) | (Volts) |
|    | IS(Phe-d5)                        | 171.1  | 125.2  | 63      | 8       | 21      | 24      |
| 1  | Uric acid                         | 169.1  | 169.1  | 20      | 10      | 5       | 10      |
| 2  | Uridine                           | 243.1  | 243.1  | -20     | -10     | -5      | -5      |
| 3  | Hypoxanthine                      | 137    | 94     | 40      | 10      | 18      | 10      |
| 4  | Allantoin                         | 157.1  | 114    | -20     | -10     | -16     | -5      |
| 5  | 2-deoxyguanosine                  | 268    | 152    | 40      | 10      | 25      | 15      |
| 6  | Xanthosine                        | 285    | 153    | 40      | 10      | 20      | 10      |
| 7  | Xanthine                          | 153    | 109.9  | 40      | 10      | 14      | 10      |
| 8  | Inosine                           | 269.1  | 137    | 40      | 10      | 36      | 10      |
| 9  | Adenosine                         | 268.1  | 118.9  | 40      | 10      | 28      | 10      |
| 10 | N-phenylacetyl glycine            | 194.2  | 91.1   | 40      | 9       | 20      | 17      |
| 11 | Cholic acid                       | 409.3  | 373.3  | 40      | 9       | 13      | 11      |
| 12 | Taurine                           | 126    | 126    | 20      | 10      | 5       | 10      |
| 13 | Ursodeoxycholic acid(UDCA)        | 391.28 | 391.28 | -20     | -5      | -5      | -5      |
| 14 | Glycocholic acid                  | 464.3  | 464.3  | -20     | -10     | -5      | -5      |
| 15 | Glycochenodeoxycholic acid(GCDCA) | 450.4  | 450.4  | 20      | 10      | 5       | 5       |
| 16 | LCA(lithocholic acid)             | 375.3  | 375.3  | -10     | -10     | -10     | -5      |
| 17 | Taurocholic acid                  | 514.3  | 514.3  | -10     | -10     | -30     | -5      |
| 18 | Glycolithocholic acid(GLCA)       | 432.3  | 74     | -10     | -10     | -64     | -5      |
| 19 | Taurochenodexy cholic acid        | 498.3  | 498.3  | -10     | -10     | -10     | -5      |
| 20 | C20:4LPC                          | 588.5  | 588.5  | -20     | -10     | -5      | -5      |
| 21 | C16:1LPC                          | 494.3  | 494.3  | 20      | 10      | 5       | 5       |
| 22 | C18:1LPC                          | 522.4  | 522.4  | 20      | 10      | 5       | 10      |
| 23 | LPE(18:0)                         | 482.3  | 482.3  | 10      | 10      | 5       | 10      |
| 24 | LPC(16:0)                         | 496.3  | 496.3  | 10      | 10      | 5       | 10      |
| 25 | PC(16:0/0:0)                      | 496.3  | 496.3  | 10      | 10      | 5       | 10      |
| 26 | LPC(18:0)                         | 524.4  | 524.4  | 10      | 10      | 5       | 10      |
| 27 | PE(36:4)                          | 740.6  | 740.5  | 10      | 10      | 5       | 10      |
| 28 | PE(38:4)                          | 768.6  | 768.6  | 10      | 10      | 5       | 10      |
| 29 | LPC(20:1)                         | 550.4  | 550.4  | 10      | 10      | 5       | 10      |
| 30 | LPC(22:6)                         | 568.3  | 568.3  | 10      | 10      | 5       | 10      |
| 31 | PC(36:4)                          | 782.5  | 782.5  | 10      | 10      | 10      | 10      |
| 32 | PC(36:3)                          | 784.6  | 784.6  | 10      | 10      | 10      | 10      |
| 33 | PC(16:0/22:6)                     | 806.6  | 806.6  | 10      | 10      | 10      | 10      |
| 34 | PC(16:0/18:3)                     | 756.6  | 756.6  | 10      | 10      | 10      | 10      |
| 35 | 2-hydroxyglutarate(2-HG)          | 147.1  | 129.2  | -25     | -10     | -14     | -10     |
| 36 | Melavonic acid                    | 147    | 147    | -35     | -10     | -20     | -5      |
| 37 | Palmitic acid                     | 255    | 255    | -10     | -10     | -10     | -5      |

|    |                                          |        |       |     |     |     |     |
|----|------------------------------------------|--------|-------|-----|-----|-----|-----|
| 38 | 3-hydroxybutyric                         | 103    | 59    | -40 | -10 | -15 | -5  |
| 39 | Ethylmalonic acid                        | 131    | 86.9  | -40 | -10 | -15 | -5  |
| 40 | Mesaconic                                | 128.9  | 84.9  | -40 | -10 | -15 | -5  |
| 41 | Acetylcarnitine                          | 204.1  | 204.1 | 20  | 10  | 5   | 5   |
| 42 | Aminohippuric acid                       | 195.1  | 195.1 | 20  | 10  | 5   | 5   |
| 43 | Palmitoyl-L-carnitine                    | 400.3  | 400.3 | 20  | 10  | 5   | 5   |
| 44 | Choline                                  | 104.2  | 60.3  | 40  | 10  | 17  | 10  |
| 45 | Malondialdehyde(MDA)                     | 235.1  | 159.1 | 25  | 10  | 5   | 5   |
| 46 | Glutamic                                 | 147.1  | 130.1 | 80  | 10  | 5   | 10  |
| 47 | Glutathione,Oxidized(GSSG)               | 613.2  | 355.3 | 98  | 10  | 34  | 10  |
| 48 | Glutathione(GSH)                         | 433.1  | 304.1 | 79  | 8   | 22  | 8   |
| 49 | L-Histidine                              | 154.1  | 154.1 | -20 | -5  | -5  | -5  |
| 50 | L-Leucine                                | 132.1  | 86.1  | 55  | 6   | 16  | 16  |
| 51 | Isoleucine                               | 132    | 132   | 20  | 10  | 5   | 5   |
| 52 | L-Valine                                 | 118.1  | 118.1 | 20  | 10  | 5   | 5   |
| 53 | Hippuric acid                            | 180.1  | 180.1 | 20  | 10  | 5   | 5   |
| 54 | Phenylalanine                            | 166.1  | 120.1 | 40  | 10  | 15  | 10  |
| 55 | Phenylpyruvic acid                       | 165.1  | 165.1 | 20  | 10  | 5   | 5   |
| 56 | Creatine                                 | 132    | 90    | 40  | 10  | 15  | 10  |
| 57 | Spermidine                               | 146.1  | 146.1 | 20  | 10  | 5   | 5   |
| 58 | Creatinine                               | 114.5  | 44    | 40  | 10  | 15  | 10  |
| 59 | Proline                                  | 116.1  | 116.1 | 20  | 10  | 5   | 5   |
| 60 | Alanine                                  | 90.1   | 44.2  | 40  | 10  | 15  | 10  |
| 61 | L-Tryptophan                             | 205.2  | 188.1 | 144 | 11  | 16  | 12  |
| 62 | L-Kynurenine                             | 209.1  | 192.1 | 45  | 8   | 14  | 13  |
| 63 | Indole-3-lactic acid                     | 204.1  | 204.1 | -20 | -10 | -5  | -5  |
| 64 | Xanthurenic acid                         | 204    | 204   | -20 | -10 | -5  | -5  |
| 65 | 5-hydroxytryptophan(5-HTP)               | 221.1  | 204.3 | 54  | 10  | 16  | 13  |
| 66 | 5-hydroxytryptamine(5-HT)                | 177.1  | 160.1 | 45  | 9   | 16  | 31  |
| 67 | Ophthalmic acid(Opht A)                  | 290.2  | 161.1 | 40  | 10  | 15  | 15  |
| 68 | 3-nitro-tyrosine(N-Tyr)                  | 227.1  | 181   | 40  | 10  | 25  | 10  |
| 69 | 3-chloro-Ltyrosine(Cl-Tyr)               | 216    | 170   | 40  | 10  | 30  | 15  |
| 70 | DL-o-tyrosine(o-Tyr)                     | 182.1  | 136.1 | 40  | 10  | 20  | 10  |
| 71 | Carnitine                                | 162.1  | 162.1 | 20  | 10  | 5   | 5   |
| 72 | S-(adenosyl)-L-homocysteine (SAH)        | 385.1  | 136   | 40  | 10  | 35  | 25  |
| 73 | Glycine                                  | 76     | 30.1  | 40  | 10  | 15  | 10  |
| 74 | 4-(2-aminophenyl)-2,4-dioxobutanoic acid | 208.1  | 162.1 | 40  | 10  | 15  | 10  |
| 75 | 4,6-dihydroxyquinoline                   | 162.1  | 116   | 40  | 10  | 15  | 10  |
| 76 | p-Cresol Glucuronide                     | 283.08 | 107   | -20 | -10 | -15 | -10 |
| 77 | Trigonelline                             | 138.1  | 138.1 | 20  | 10  | 5   | 5   |
| 78 | pyridoxic acid                           | 182.1  | 182.1 | -20 | -10 | -5  | -5  |

|     |                                   |        |       |      |     |     |     |
|-----|-----------------------------------|--------|-------|------|-----|-----|-----|
| 79  | N-acetyl-glucosamine              | 220.1  | 118.9 | -22  | -13 | -10 | -10 |
| 80  | Pantothenic acid                  | 218.1  | 218.1 | -20  | -10 | -5  | -5  |
| 81  | Citric acid                       | 191    | 111.2 | -25  | -10 | -17 | -6  |
| 82  | Isocitrate                        | 190.8  | 72.9  | -20  | -10 | -30 | -5  |
| 83  | Oxaloacetate                      | 130.8  | 86.9  | -25  | -10 | -10 | -5  |
| 84  | Succinic acid                     | 117    | 73    | -40  | -10 | -15 | -10 |
| 85  | a-Ketoglutaric acid               | 145.1  | 101   | -40  | -10 | -13 | -6  |
| 86  | Aconitic acid                     | 173    | 85    | -40  | -10 | -15 | -10 |
| 87  | Malic acid                        | 132.9  | 115   | -40  | -10 | -15 | -10 |
| 88  | Fumaric acid                      | 115    | 70.9  | -40  | -10 | -15 | -10 |
| 89  | 1,6 –Fructose Diphosphate         | 339.1  | 97.1  | -40  | -7  | -20 | -5  |
| 90  | Glucose-6-phosphate               | 259.02 | 97    | -40  | -10 | -15 | -10 |
| 91  | Glucosamine-6-phosphate           | 260    | 126   | 40   | 10  | 15  | 10  |
| 92  | Pyruic acid                       | 87.3   | 87.3  | -20  | -5  | -5  | -5  |
| 93  | Glucose                           | 179.1  | 89.1  | -20  | -5  | -8  | -5  |
| 94  | Lactate                           | 89     | 89    | -40  | -10 | -10 | -5  |
| 95  | Glucose-1-phosphate               | 258.9  | 79    | -40  | -10 | -15 | -10 |
| 96  | ADP                               | 426    | 328   | -110 | -10 | -19 | -5  |
| 97  | .NAD                              | 662.1  | 540   | -83  | -10 | -20 | -5  |
| 98  | NADP                              | 742.1  | 620.1 | -105 | -10 | -20 | -5  |
| 99  | NADPH                             | 746    | 729.1 | 40   | 10  | 20  | 10  |
| 100 | NADH                              | 331.4  | 78.8  | -40  | -10 | -72 | -5  |
| 101 | 8-Isoprostaglandin F2a(8-iso-PGF) | 353.2  | 193.1 | -100 | -9  | -40 | -10 |
| 102 | threonine                         | 176    | 74    | 100  | 10  | 10  | 10  |
| 103 | betaine                           | 118.0  | 59.3  | 31   | 10  | 28  | 10  |
| 104 | lysine                            | 203    | 186   | 55   | 10  | 5   | 10  |
| 105 | Ornithine                         | 189    | 172   | 100  | 10  | 5   | 10  |
| 106 | proline                           | 172    | 70    | 100  | 10  | 15  | 10  |
| 107 | 3-indoxylsulfate                  | 212.2  | 80    | 100  | 10  | 18  | 10  |
| 108 | methylhistidine                   | 170.1  | 124.1 | 100  | 10  | 20  | 10  |
| 109 | β-alanine                         | 90     | 44    | 100  | 10  | 20  | 10  |
| 110 | methionine                        | 206    | 104   | 100  | 10  | 18  | 10  |
| 111 | N,N-dimethylglycine               | 104.1  | 104.1 | 100  | 10  | 10  | 10  |
| 112 | urea                              | 241    | 109   | 56   | 10  | 32  | 10  |
| 113 | serine                            | 162    | 60    | 100  | 10  | 10  | 10  |
| 114 | pyroglutamic acid                 | 128.0  | 82.1  | 100  | -10 | -20 | -10 |
| 115 | Benzene acetyl glycine            | 193.90 | 193.9 | 100  | 10  | 10  | 10  |
| 116 | N6 - acetyl lysine                | 188.98 | 18.98 | 100  | 10  | 10  | 10  |
| 117 | arginine                          | 231    | 70    | 100  | 5   | 20  | 5   |
| 118 | nicotinamide                      | 123.1  | 80.0  | 60   | 5   | 30  | 5   |
| 119 | E1                                | 504.2  | 171.1 | 70   | 5   | 45  | 5   |
| 120 | E2                                | 506.2  | 171.1 | 70   | 5   | 48  | 5   |
| 121 | 16α-OHE1                          | 520.2  | 171.1 | 75   | 5   | 45  | 5   |

|     |           |       |       |    |   |    |   |
|-----|-----------|-------|-------|----|---|----|---|
| 122 | 16-ketoE2 | 520.2 | 171.1 | 75 | 5 | 45 | 5 |
| 123 | E3        | 522.2 | 171.1 | 75 | 5 | 45 | 5 |
| 124 | 16-epiE3  | 522.2 | 171.1 | 75 | 5 | 45 | 5 |
| 125 | 17-epiE3  | 522.2 | 171.1 | 75 | 5 | 45 | 5 |
| 126 | 2-MeOE1   | 534.2 | 171.1 | 75 | 5 | 45 | 5 |
| 127 | 3-MeOE1   | 534.2 | 171.1 | 75 | 5 | 45 | 5 |
| 128 | 4-MeOE1   | 534.2 | 171.1 | 75 | 5 | 45 | 5 |
| 129 | 2-MeOE2   | 536.2 | 171.1 | 75 | 5 | 45 | 5 |
| 130 | 4-MeOE2   | 536.2 | 171.1 | 75 | 5 | 45 | 5 |
| 131 | 2-OHE1    | 753.3 | 170.1 | 85 | 5 | 50 | 5 |
| 132 | 4-OHE1    | 753.3 | 170.1 | 85 | 5 | 50 | 5 |
| 133 | 2-OHE2    | 755.3 | 170.1 | 85 | 5 | 50 | 5 |
| 134 | 4-OHE2    | 755.3 | 170.1 | 85 | 5 | 50 | 5 |

Supplemental Table 2. Results obtained to evaluate the accuracy of the developed UPLC-MS / MS method (n=6).

| Sample       | Compound               | Concentration | Intra-day    |               | Inter-day    |               |
|--------------|------------------------|---------------|--------------|---------------|--------------|---------------|
|              |                        |               | Accuracy (%) | Precision (%) | Accuracy (%) | Precision (%) |
| Serum        | GSH                    | 750(ng/ml)    | 98.25        | 5.78          | 111.22       | 3.54          |
|              |                        | 1000(ng/ml)   | 110.2        | 4.12          | 86.71        | 4.95          |
|              |                        | 5000(ng/ml)   | 88.17        | 3.17          | 91.18        | 3.71          |
|              | GSSG                   | 1500(ng/ml)   | 85.33        | 3.17          | 89.36        | 6.78          |
|              |                        | 2000(ng/ml)   | 89.09        | 5.84          | 93.22        | 5.55          |
|              |                        | 10000(ng/ml)  | 86.24        | 6.04          | 110.31       | 6.49          |
|              | L-Leucine              | 750(ng/ml)    | 114.55       | 3.45          | 102.57       | 5.92          |
|              |                        | 1000(ng/ml)   | 112.36       | 10.12         | 112.36       | 11.21         |
|              |                        | 5000(ng/ml)   | 98.54        | 5.42          | 101.28       | 9.54          |
|              | L-Kynurenine           | 37(ng/ml)     | 85.63        | 6.78          | 91.56        | 8.12          |
|              |                        | 50(ng/ml)     | 88.24        | 5.98          | 101.39       | 6.19          |
|              |                        | 250(ng/ml)    | 114.23       | 5.12          | 85.16        | 8.87          |
|              | L-Tryptophan           | 4500(ng/ml)   | 108.24       | 11.3          | 88.31        | 6.51          |
|              |                        | 6000(ng/ml)   | 98.32        | 6.57          | 84.17        | 5.59          |
|              |                        | 30000(ng/ml)  | 95.17        | 5.19          | 90.17        | 4.23          |
|              | 5-HTP                  | 1.5(ng/ml)    | 112.88       | 10.28         | 85.20        | 2.98          |
|              |                        | 2(ng/ml)      | 111.57       | 8.99          | 91.13        | 5.69          |
|              |                        | 10(ng/ml)     | 88.02        | 5.12          | 107.68       | 12.01         |
|              | Cholic acid            | 300(ng/ml)    | 112.36       | 6.38          | 86.38        | 9.52          |
|              |                        | 400(ng/ml)    | 109.54       | 5.44          | 85.96        | 10.81         |
|              |                        | 2000(ng/ml)   | 84.28        | 5.29          | 113.48       | 13.29         |
|              | 5-HT                   | 6(ng/ml)      | 94.19        | 6.38          | 109.33       | 9.19          |
|              |                        | 8(ng/ml)      | 109.29       | 4.55          | 87.89        | 5.55          |
| 40(ng/ml)    |                        | 114.11        | 3.91         | 88.36         | 4.36         |               |
| Urine        | N-phenylacetylglucylin | 1800(ng/ml)   | 87.28        | 8.99          | 85.29        | 10.11         |
|              |                        | 2500(ng/ml)   | 91.06        | 4.36          | 94.95        | 5.29          |
|              |                        | 12500(ng/ml)  | 107.22       | 4.91          | 111.12       | 3.61          |
|              | GSH                    | 75(ng/ml)     | 95.32        | 6.71          | 105.61       | 4.21          |
|              |                        | 100(ng/ml)    | 109.23       | 5.13          | 89.21        | 4.17          |
|              |                        | 500(ng/ml)    | 90.22        | 4.58          | 98.21        | 6.32          |
|              | GSSG                   | 150(ng/ml)    | 114.32       | 3.17          | 89.36        | 6.78          |
| 200(ng/ml)   |                        | 89.09         | 6.01         | 86.14         | 5.69         |               |
| 1000(ng/ml)  |                        | 89.31         | 7.24         | 99.23         | 6.88         |               |
| L-Leucine    | 750(ng/ml)             | 109.25        | 11.36        | 110.34        | 8.24         |               |
|              | 1000(ng/ml)            | 85.69         | 8.47         | 92.43         | 9.19         |               |
|              | 5000(ng/ml)            | 89.36         | 6.15         | 95.67         | 5.27         |               |
| L-Tryptophan | 4500(ng/ml)            | 92.34         | 9.21         | 89.23         | 9.25         |               |

|                      |              |        |       |        |       |
|----------------------|--------------|--------|-------|--------|-------|
|                      | 6000(ng/ml)  | 105.69 | 5.68  | 104.25 | 10.68 |
|                      | 30000(ng/ml) | 86.11  | 4.44  | 96.25  | 5.68  |
|                      | 1.5(ng/ml)   | 85.68  | 11.31 | 88.21  | 6.17  |
| 5-HTP                | 2(ng/ml)     | 112.36 | 9.22  | 98.25  | 6.74  |
|                      | 10(ng/ml)    | 90.36  | 6.34  | 111.39 | 10.58 |
|                      | 300(ng/ml)   | 98.14  | 5.11  | 90.14  | 5.69  |
| Cholic acid          | 400(ng/ml)   | 85.36  | 7.65  | 86.36  | 10.14 |
|                      | 2000(ng/ml)  | 91.25  | 8.33  | 114.01 | 10.36 |
|                      | 6(ng/ml)     | 98.12  | 5.98  | 111.32 | 8.64  |
| 5-HT                 | 8(ng/ml)     | 111.98 | 5.17  | 89.69  | 4.98  |
|                      | 40(ng/ml)    | 85.23  | 3.25  | 91.58  | 6.91  |
|                      | 1800(ng/ml)  | 91.02  | 7.51  | 90.36  | 10.11 |
| N-phenylacetylglycin | 2500(ng/ml)  | 95.98  | 8.68  | 109.25 | 5.29  |
|                      | 12500(ng/ml) | 111.36 | 6.72  | 101.09 | 4.55  |

---

Supplemental Table 3. Matrix variation on the assay.

| Sample | Parameters                          | GSH                                      |                                          | GSSG      |        | L-Leucine |        | L-Kynurenine |        | L-Tryptophan |        | 5-HTP    |         | Cholic acid |        | 5-HT     |         | N-phenylacetylglucine |        |          |
|--------|-------------------------------------|------------------------------------------|------------------------------------------|-----------|--------|-----------|--------|--------------|--------|--------------|--------|----------|---------|-------------|--------|----------|---------|-----------------------|--------|----------|
|        |                                     | Base line                                | Spiked                                   | Base line | Spiked | Base line | Spiked | Baseline     | Spiked | Baseline     | Spiked | Baseline | Spiked  | Baseline    | Spiked | Baseline | Spiked  | Baseline              | Spiked |          |
| Plasma | Analyte spiked concentration(ng/ml) |                                          | 1000                                     |           | 2000   |           | 1000   |              | 50     |              | 6000   |          | 2       |             | 400    |          | 8       |                       | 2500   |          |
|        | A                                   | Measyred mean concentration (ng/ml; n=5) | 2000                                     | 3120.3    | 4000   | 6221.38   | 2000   | 3110.2       | 100    | 152.3        | 12000  | 18542.1  | 4       | 5.85        | 800    | 1219.23  | 16      | 25.12                 | 5000   | 7809.23  |
|        |                                     | CV%                                      |                                          | 3.14      |        | 4.15      |        | 2.69         |        | 4.59         |        | 3.69     |         | 6.15        |        | 3.44     |         | 5.17                  |        | 4.69     |
|        |                                     | Spiked recovery (%)                      |                                          | 112.0     |        | 111.1     |        | 111.0        |        | 104.6        |        | 109.0    |         | 92.5        |        | 104.8    |         | 114.0                 |        | 112.4    |
|        | B                                   | Measyred mean concentration (ng/ml; n=5) | 4000                                     | 5593.5    | 8000   | 10894.2   | 4000   | 5126.39      | 200    | 261.36       | 24000  | 32591.4  | 8       | 11.23       | 1600   | 2123.56  | 32      | 41.25                 | 10000  | 14102.4  |
|        |                                     | CV%                                      |                                          | 2.88      |        | 3.56      |        | 4.07         |        | 2.19         |        | 3.45     |         | 7.12        |        | 5.13     |         | 6.98                  |        | 3.14     |
|        |                                     | Spiked recovery (%)                      |                                          | 114.8     |        | 111.2     |        | 103.2        |        | 105.7        |        | 110.8    |         | 115.4       |        | 107.7    |         | 103.9                 |        | 116.0    |
|        | C                                   | Measyred mean concentration (ng/ml; n=5) | 8000                                     | 9180.23   | 16000  | 18256.5   | 8000   | 9156.38      | 400    | 451.23       | 48000  | 55084.4  | 16      | 18.22       | 3200   | 3660.57  | 64      | 73.48                 | 20000  | 22900.3  |
|        |                                     | CV%                                      |                                          | 4.12      |        | 3.17      |        | 3.47         |        | 3.21         |        | 3.54     |         | 3.42        |        | 4.19     |         | 3.57                  |        | 3.86     |
|        |                                     | Spiked recovery (%)                      |                                          | 118.0     |        | 112.8     |        | 115.6        |        | 102.5        |        | 118.1    |         | 111.0       |        | 115.1    |         | 118.5                 |        | 116.0    |
|        | Urine                               | Analyte spiked concentration(ng/ml)      |                                          | 100       |        | 200       |        | 1000         |        | 50           |        | 6000     |         | 2           |        | 400      |         | 8                     |        | 2500     |
|        |                                     | A                                        | Measyred mean concentration (ng/ml; n=5) | 200       | 309.2  | 400       | 625.43 | 2000         | 3188.6 | 100          | 144.26 | 12000    | 17651.2 | 4           | 5.22   | 800      | 1189.14 | 16                    | 24.33  | 5000     |
|        |                                     | CV%                                      |                                          | 3.10      |        | 4.65      |        | 6.51         |        | 5.29         |        | 6.32     |         | 4.32        |        | 6.53     |         | 8.77                  |        | 8.74     |
|        |                                     | Spiked recovery (%)                      |                                          | 110.10    |        | 108.6     |        | 113.4        |        | 111.23       |        | 113.3    |         | 82.6        |        | 114.2    |         | 113.25                |        | 116.5    |
| B      |                                     | Measyred mean concentration (ng/ml; n=5) | 400                                      | 533.2     | 800    | 1112.6    | 4000   | 5188.21      | 200    | 252.6        | 24000  | 29566.3  | 8       | 12.67       | 1600   | 2078.21  | 32      | 40.87                 | 10000  | 14626.78 |
|        |                                     | CV%                                      |                                          | 3.15      |        | 6.46      |        | 6.08         |        | 4.28         |        | 6.55     |         | 8.10        |        | 8.76     |         | 7.15                  |        | 5.47     |
|        |                                     | Spiked recovery (%)                      |                                          | 112.1     |        | 86.4      |        | 111.8        |        | 107.51       |        | 88.14    |         | 111.6       |        | 116.1    |         | 96.69                 |        | 113.46   |
| C      |                                     | Measyred mean concentration (ng/ml; n=5) | 800                                      | 918.25    | 1600   | 1867.9    | 8000   | 9201.42      | 400    | 440.32       | 48000  | 55243.2  | 16      | 18.96       | 3200   | 3566.35  | 64      | 71.33                 | 20000  | 21546.5  |
|        |                                     | CV%                                      |                                          | 5.13      |        | 3.87      |        | 4.59         |        | 3.99         |        | 3.81     |         | 4.43        |        | 5.16     |         | 4.98                  |        | 8.34     |



Spiked recovery (%)

98.23

114.2

109.8

89.54

106.43

98.54

103.22

83.67

118.97

---
